# Supplementary material for: Discrimination and classification of high explosives and other organic materials based on laser-induced plasma spectroscopy
Source: Royal Society of Chemistry journal article supplement (doi:10.1039/d3ja00211j), 2023-01-01
Supplement: d3ja00211j1.pdf [file d3ja00211j1.pdf]

**Supplementary Information for**  
**Discrimination and classification of high explosives and other**  
**organic materials based on laser-induced plasma spectroscopy**

Xianshuang Wang<sup>a</sup>, Yage He<sup>a</sup>, Ying Zhang<sup>a</sup>, An Li<sup>a</sup>, Xinyu Zhang<sup>a</sup>, Xueyong Guo<sup>b</sup>, Tonglai Zhang<sup>b</sup>, Wei Guo<sup>a</sup>, Ruibin Liu<sup>a,\*</sup>, and Yugui Yao<sup>a,c,\*</sup>

<sup>a</sup>Key Lab of advanced optoelectronic quantum architecture and measurement (Ministry of Education), Beijing Key Lab of Nanophotonics & Ultrafine Optoelectronic Systems, School of Physics, Beijing Institute of Technology, Beijing 100081, China.

<sup>b</sup>State Key Laboratory of Explosion Science and Technology, Beijing Institute of Technology, Beijing 100081, China

<sup>c</sup>Frontiers Science Center for High Energy Material (MOE), Beijing Institute of Technology, Beijing 100081, China.

\* Correspondence author:

TEL: +86-13520398457. E-mail: liusir@bit.edu.cn (Ruibin Liu)

TEL: +86-010-68918672. E-mail: ygyao@bit.edu.cn (Yugui Yao)

## Contents

**Page S2 Supplementary Figure 1**

LIPS spectra of sample of E2-E5 and B1-B5.

**Page S2 Supplementary Figure 2.**

The correlation graphs C2 vs Aromatic index (a), C2 vs OB (b), C vs Aromatic index (c) and C vs OB (d).

**Page S2 Supplementary Figure 3.**

The correlation graphs C vs C-C %+C=C % (a) and C2 vs C-C %+C=C % (b).

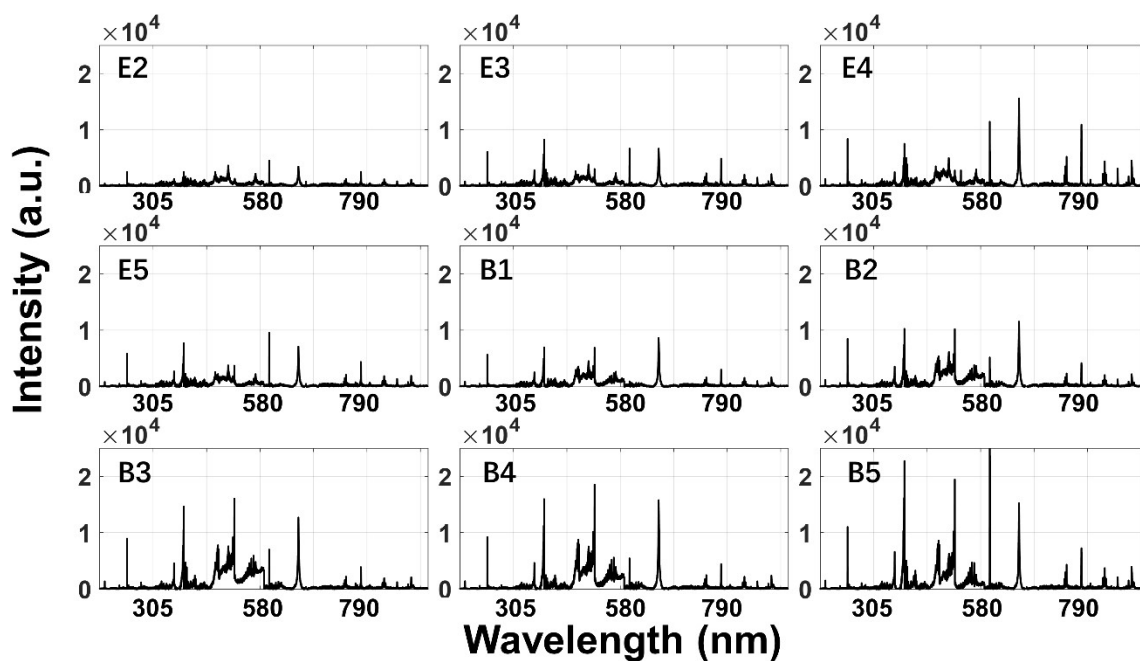

**Supplementary Figure 1.** LIPS spectra of sample of E2-E5 and B1-B5.

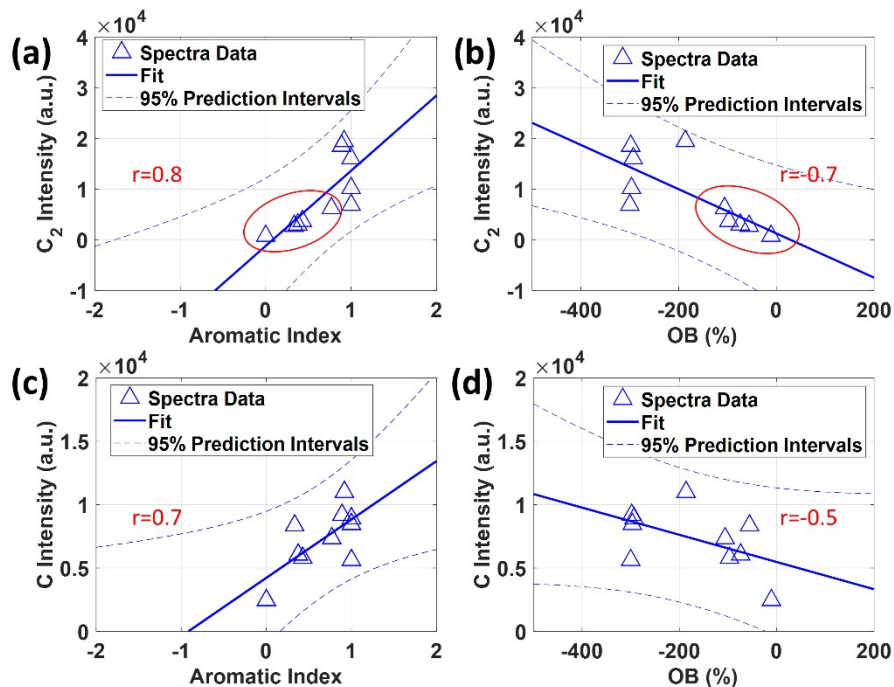

**Supplementary Figure 2.** The correlation graphs C<sub>2</sub> vs Aromatic index (a), C<sub>2</sub> vs OB (b), C vs Aromatic index (c) and C vs OB (d).

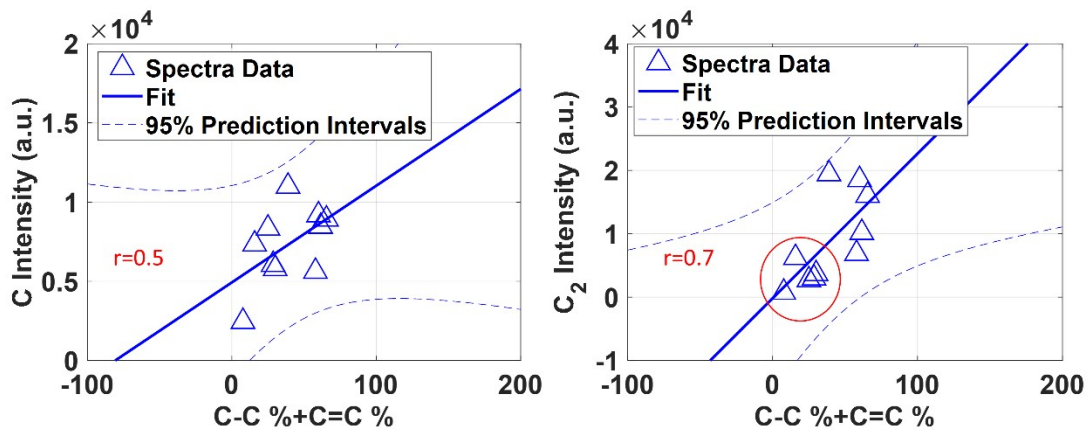

**Supplementary Figure 3.** The correlation graphs C vs C-C % + C=C % (a) and C<sub>2</sub> vs C-C % + C=C % (b).
